# Supplementary material for: Cyclic RGD Pentapeptide Cilengitide Enhances Efficacy of Gefitinib on TGF-β1-Induced Epithelial-to-Mesenchymal Transition and Invasion in Human Non-Small Cell Lung Cancer Cells
Source: PubMed Central journal article supplement (PMC8104086; doi:10.3389/fphar.2021.639095), 2021-03-24

Fig. 2A

A549\_Gefitinib\_72 h

1. control 2. TGF- $\beta$ 1 (5ng/ml) 3. TGF- $\beta$ 1 + Gefitinib 0.3 $\mu$ M 4. TGF- $\beta$ 1 + Gefitinib 1 $\mu$ M  
5. TGF- $\beta$ 1 + Gefitinib 3 $\mu$ M 6. TGF- $\beta$ 1 + Gefitinib 10 $\mu$ M

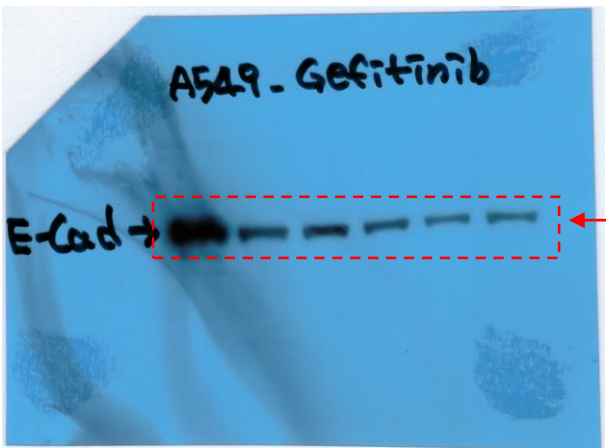

E-cadherin

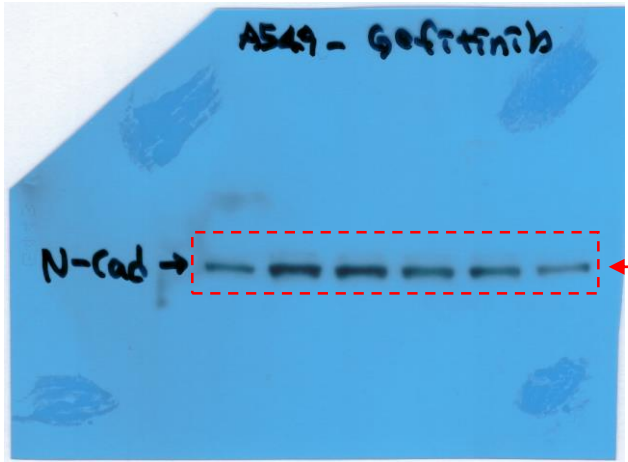

N-cadherin

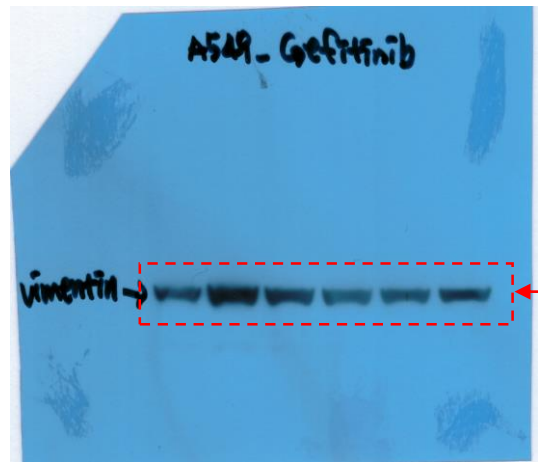

Vimentin

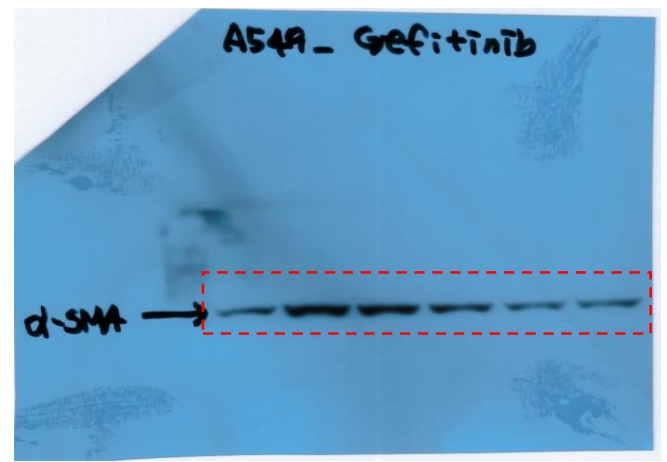

$\alpha$ -SMA

Fig. 2A

A549\_Gefitinib\_72 h

1. control 2. TGF- $\beta$ 1 (5 ng/mL) 3. TGF- $\beta$ 1 + Gefitinib 0.3  $\mu$ M 4. TGF- $\beta$ 1 + Gefitinib 1  $\mu$ M  
5. TGF- $\beta$ 1 + Gefitinib 3  $\mu$ M 6. TGF- $\beta$ 1 + Gefitinib 10  $\mu$ M

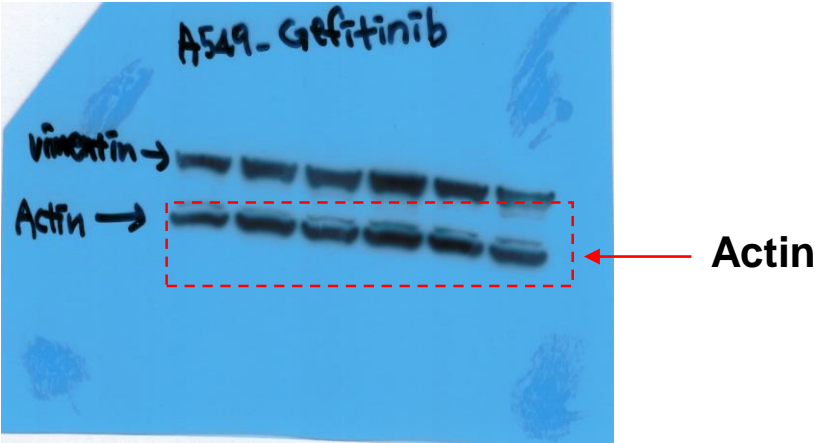

Fig. 3A

A549\_Gefitinib\_48 h

- 1. control
- 2. TGF- $\beta$ 1 (5ng/ml)
- 3. TGF- $\beta$ 1 + Gefitinib 0.3  $\mu$ M
- 4. TGF- $\beta$ 1 + Gefitinib 1  $\mu$ M
- 5. TGF- $\beta$ 1 + Gefitinib 3  $\mu$ M
- 6. TGF- $\beta$ 1 + Gefitinib 10  $\mu$ M

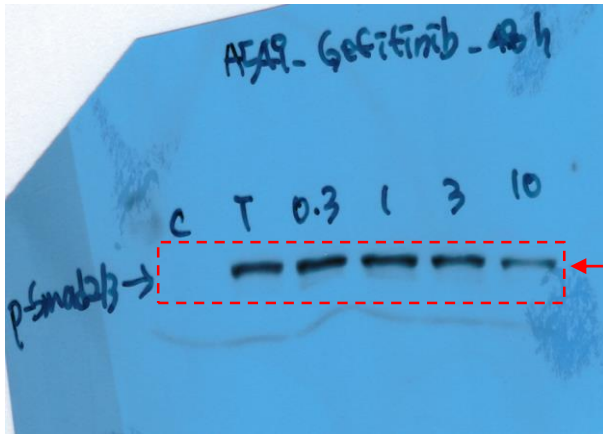

p-Smad2/3

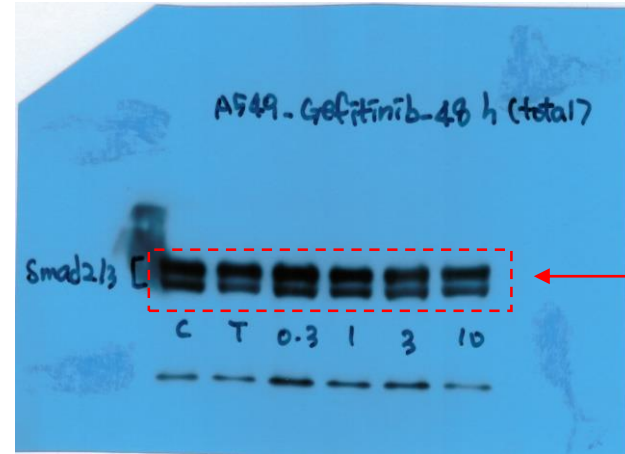

Smad2/3

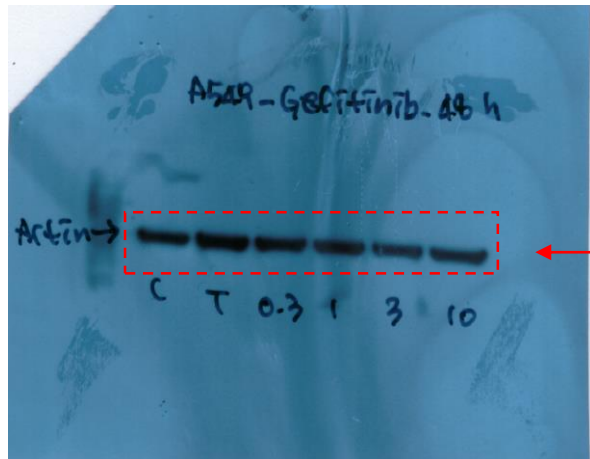

Actin

Fig. 3B

A549\_Gefitinib\_72 h

- 1. control
- 2. TGF- $\beta$ 1 (5ng/ml)
- 3. TGF- $\beta$ 1 + Gefitinib 0.3  $\mu$ M
- 4. TGF- $\beta$ 1 + Gefitinib 1  $\mu$ M
- 5. TGF- $\beta$ 1 + Gefitinib 3  $\mu$ M
- 6. TGF- $\beta$ 1 + Gefitinib 10  $\mu$ M

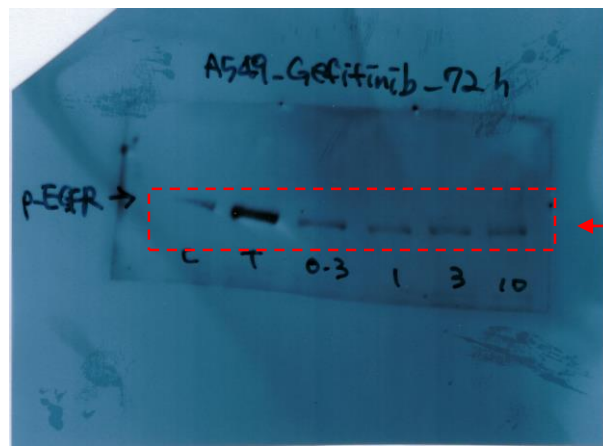

p-EGFR

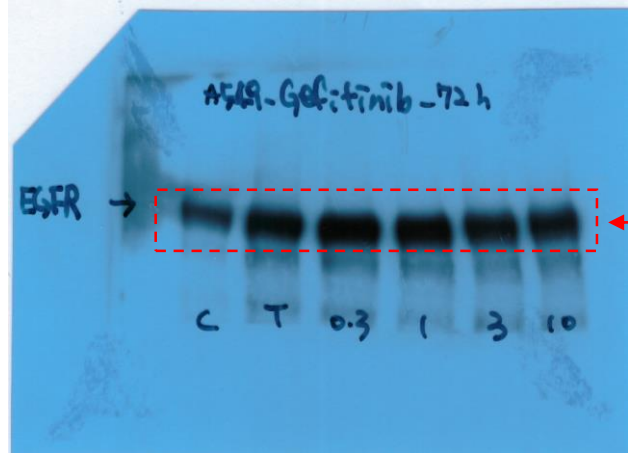

EGFR

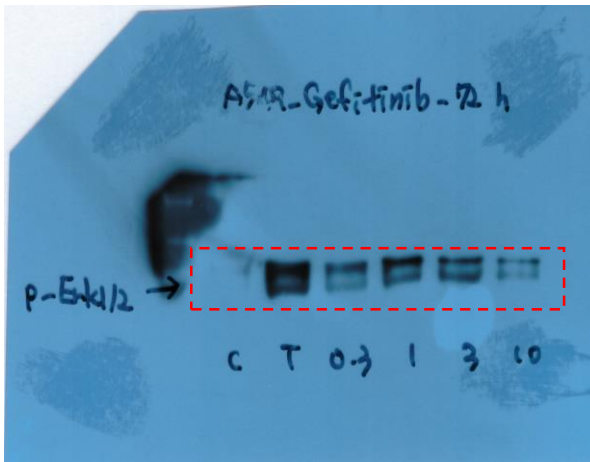

p-ERK1/2

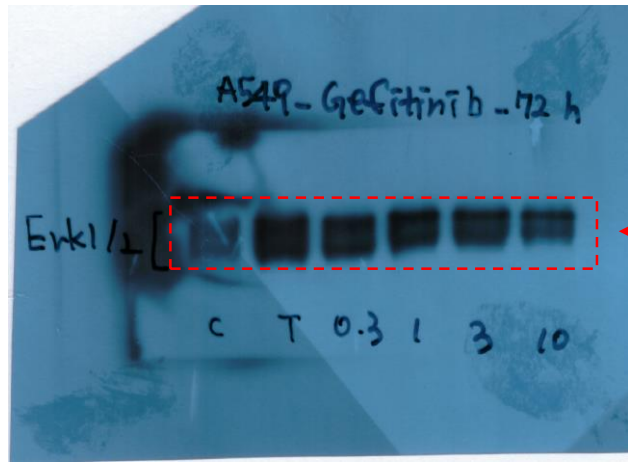

ERK1/2

Fig. 3B

A549\_Gefitinib\_48 h

- 1. control
- 2. TGF- $\beta$ 1 (5ng/ml)
- 3. TGF- $\beta$ 1 + Gefitinib 0.3  $\mu$ M
- 4. TGF- $\beta$ 1 + Gefitinib 1  $\mu$ M
- 5. TGF- $\beta$ 1 + Gefitinib 3  $\mu$ M
- 6. TGF- $\beta$ 1 + Gefitinib 10  $\mu$ M

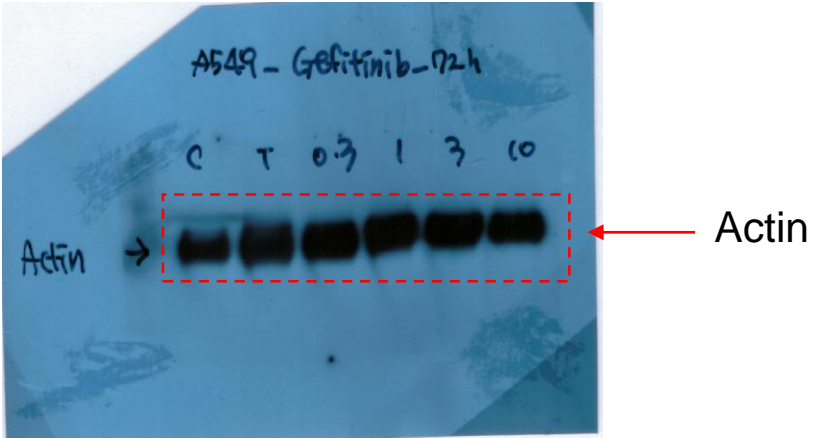

Fig. 5A

A549\_Cilengitide\_72 h

1. control 2. TGF- $\beta$ 1 (5ng/ml) 3. TGF- $\beta$ 1+cilengitide 0.3 $\mu$ M 4. TGF- $\beta$ 1+cilengitide 1 $\mu$ M  
5. TGF- $\beta$ 1+cilengitide 3 $\mu$ M 6. TGF- $\beta$ 1+cilengitide 10 $\mu$ M

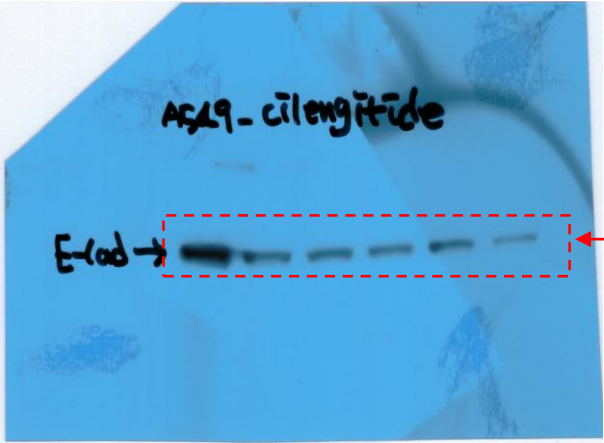

E-cadherin

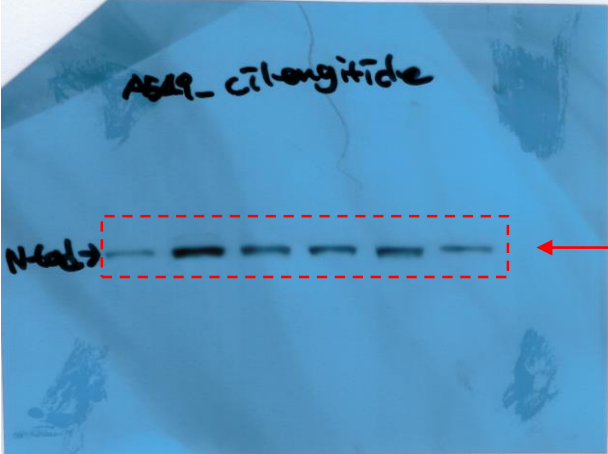

N-cadherin

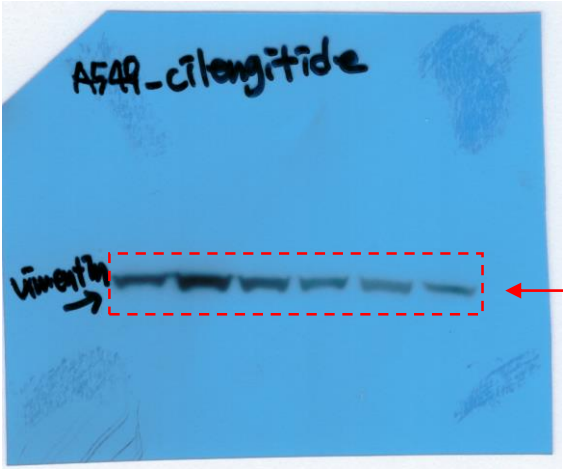

Vimentin

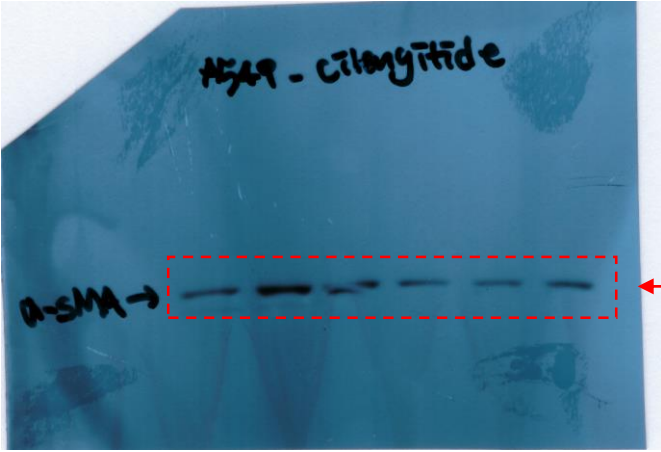

alpha-SMA

Fig. 5A

A549\_Cilengitide\_72 h

1. control 2. TGF- $\beta$ 1 (5ng/ml) 3. TGF- $\beta$ 1+cilengitide 0.3 $\mu$ M 4. TGF- $\beta$ 1+cilengitide 1 $\mu$ M  
5. TGF- $\beta$ 1+cilengitide 3 $\mu$ M 6. TGF- $\beta$ 1+cilengitide 10 $\mu$ M

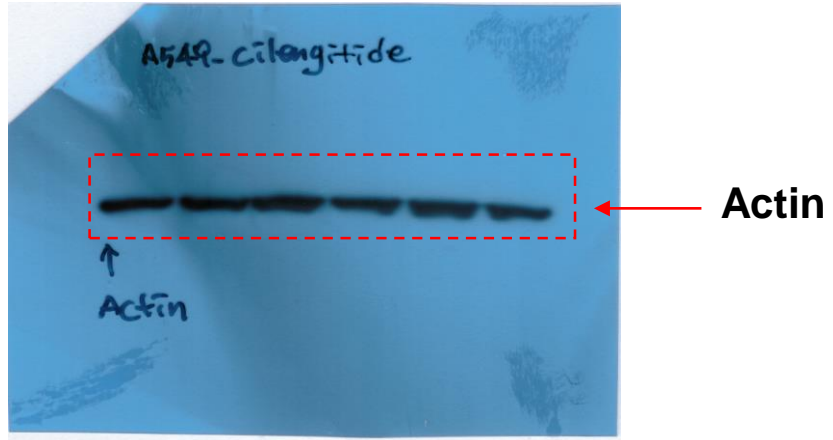

Fig. 5B

A549\_Cilengitide\_48 h

- 1. control
- 2. TGF- $\beta$ 1 (5 ng/ml)
- 3. TGF- $\beta$ 1 + cilengitide 0.3  $\mu$ M
- 4. TGF- $\beta$ 1 + cilengitide 1  $\mu$ M
- 5. TGF- $\beta$ 1 + cilengitide 3  $\mu$ M
- 6. TGF- $\beta$ 1 + cilengitide 10  $\mu$ M

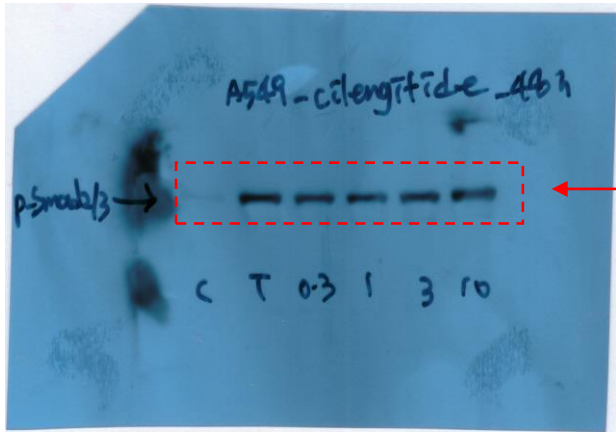

p-Smad2/3

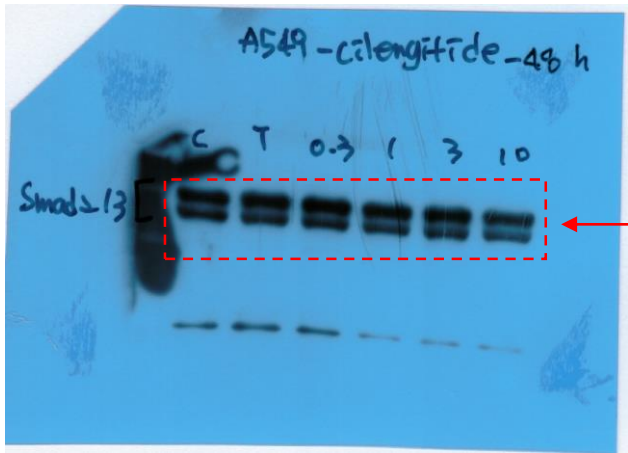

Smad2/3

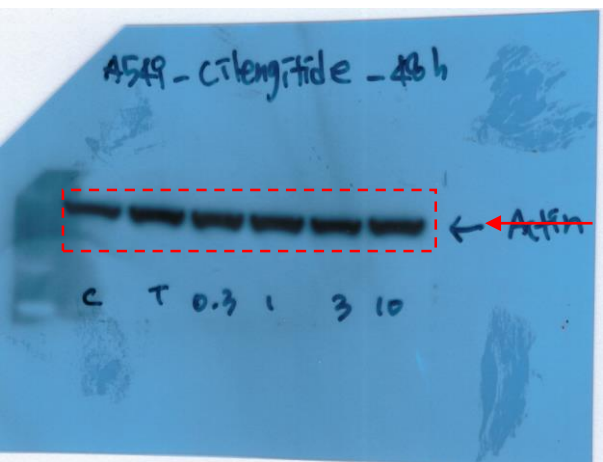

Actin



Fig. 6A

A549\_Combi (Gefitinib + Cilengitide)

1. Control 2. TGF- $\beta$ 1 (5ng/ml) 3. TGF- $\beta$ 1 + Gefitinib 1 $\mu$ M 4. TGF- $\beta$ 1 + Cilengitide 3 $\mu$ M  
5. TGF- $\beta$ 1 + Gefitinib 1 $\mu$ M + Cilengitide 3 $\mu$ M

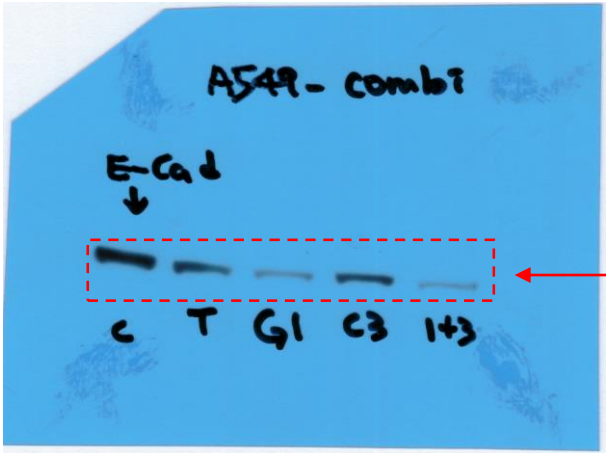

E-cadherin

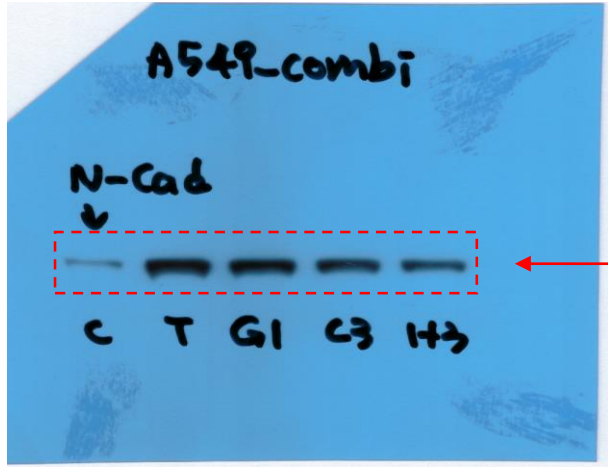

N-cadherin

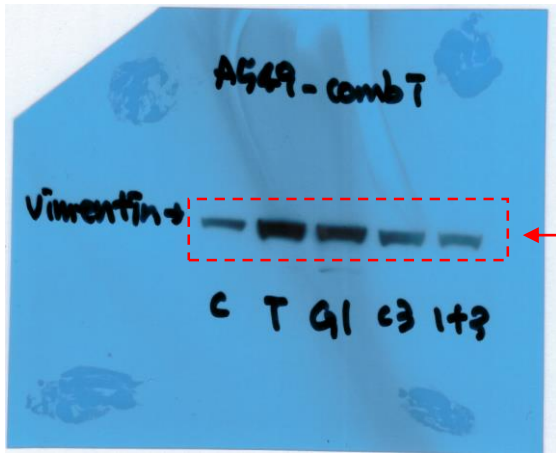

Vimentin

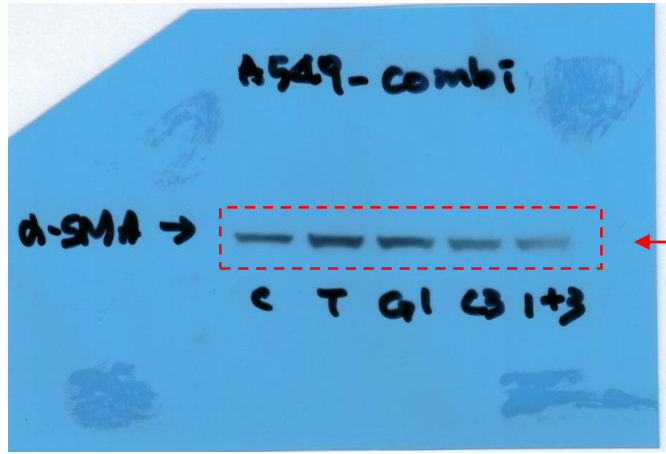

α-SMA

Fig. 6A

A549\_Combi (Gefitinib + Cilengitide)

1. Control 2. TGF- $\beta$ 1 (5ng/ml) 3. TGF- $\beta$ 1 + Gefitinib 1 $\mu$ M 4. TGF- $\beta$ 1 + Cilengitide 3 $\mu$ M  
5. TGF- $\beta$ 1 + Gefitinib 1 $\mu$ M + Cilengitide 3 $\mu$ M

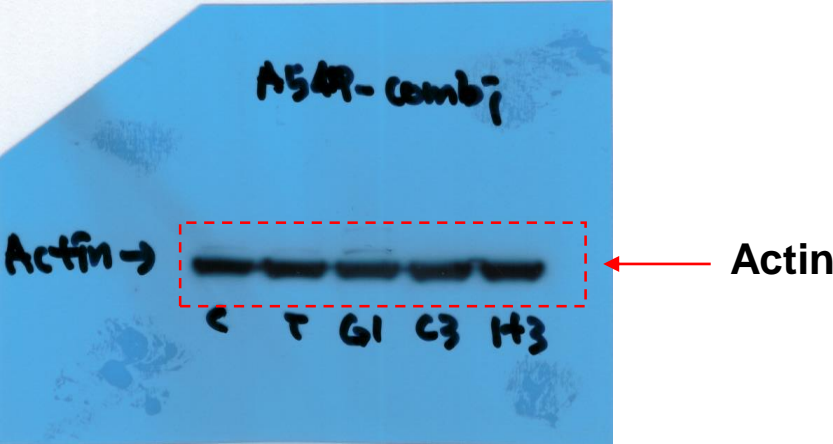

Fig. 6C

A549\_Combi (Gefitinib + Cilengitide)

1. control 2. TGF- $\beta$ 1 (5 ng/ml) 3. TGF- $\beta$ 1 + Gefitinib 1  $\mu$ M 4. TGF- $\beta$ 1 + cilengitide 3  $\mu$ M  
5. TGF- $\beta$ 1 + Gefitinib 1  $\mu$ M + cilengitide 3  $\mu$ M

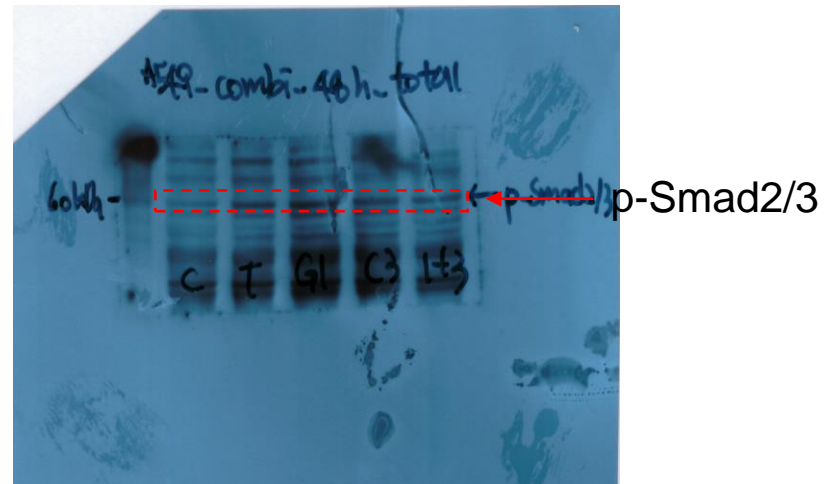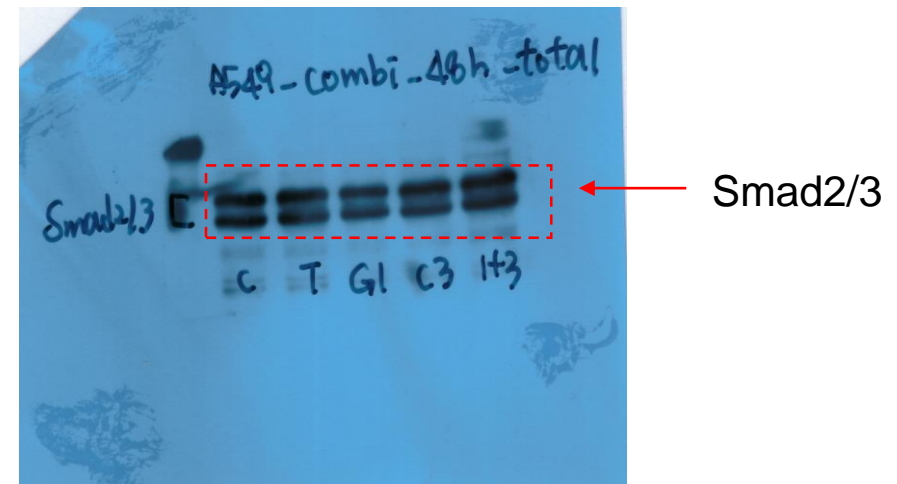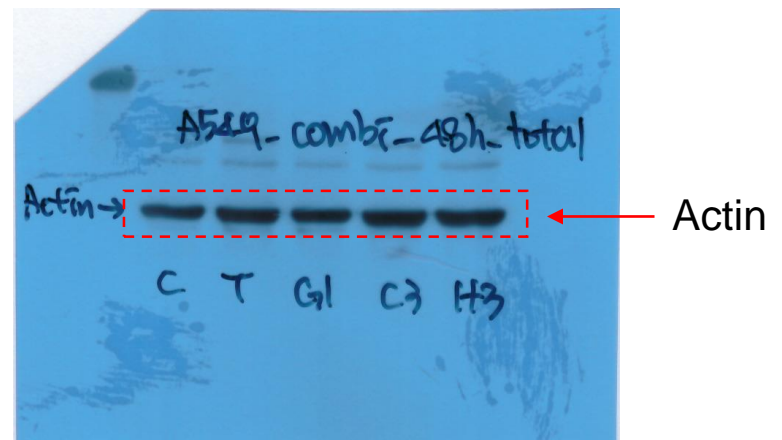

Fig. S7A

A549\_Cilengitide\_72 h

1. control 2. TGF- $\beta$ 1 (5 ng/ml) 3. TGF- $\beta$ 1 + cilengitide 0.3  $\mu$ M 4. TGF- $\beta$ 1 + cilengitide 1  $\mu$ M  
5. TGF- $\beta$ 1 + cilengitide 3  $\mu$ M 6. TGF- $\beta$ 1 + cilengitide 10  $\mu$ M

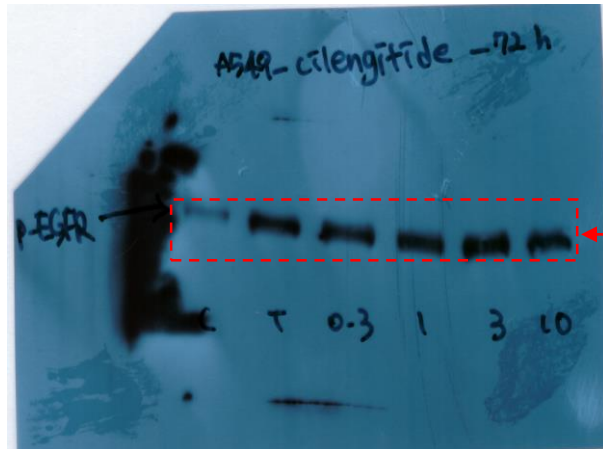

p-EGFR

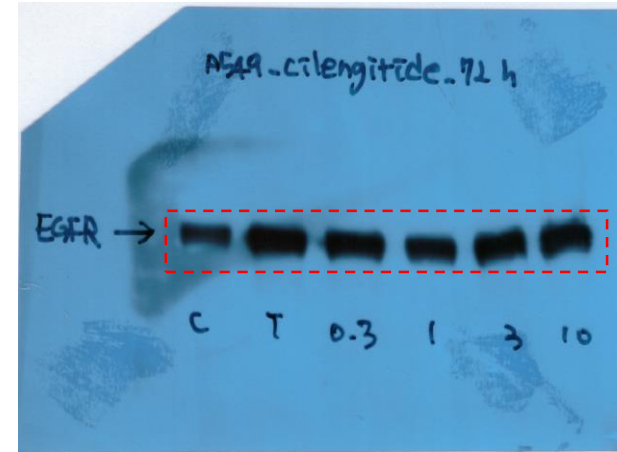

EGFR

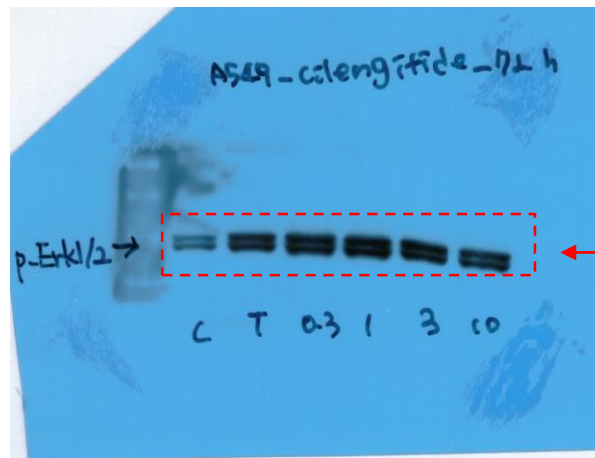

p-ERK1/2

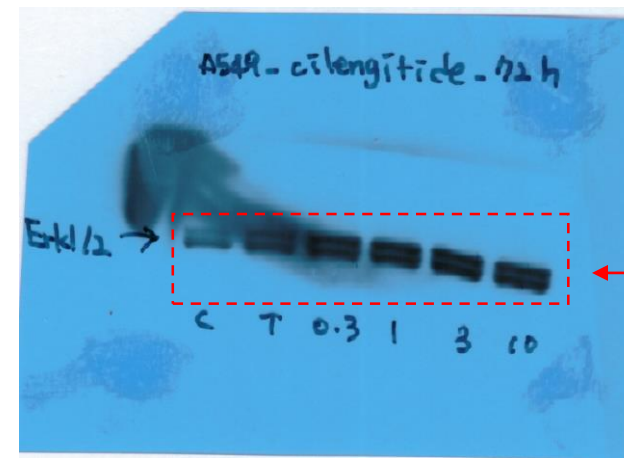

ERK1/2

Fig. S7A

A549\_Cilengitide\_72 h

1. control 2. TGF- $\beta$ 1 (5 ng/ml) 3. TGF- $\beta$ 1 + cilengitide 0.3  $\mu$ M 4. TGF- $\beta$ 1 + cilengitide 1  $\mu$ M  
5. TGF- $\beta$ 1 + cilengitide 3  $\mu$ M 6. TGF- $\beta$ 1 + cilengitide 10  $\mu$ M

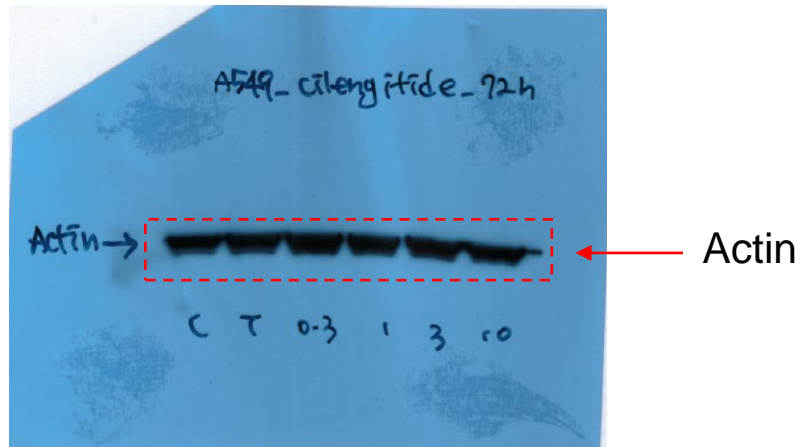

1. control 2. TGF- $\beta$ 1 (5ng/ml) 3. TGF- $\beta$ 1 + cilengitide 0.3 $\mu$ M 4. TGF- $\beta$ 1 + cilengitide 1 $\mu$ M  
5. TGF- $\beta$ 1 + cilengitide 3 $\mu$ M 6. TGF- $\beta$ 1 + cilengitide 10 $\mu$ M

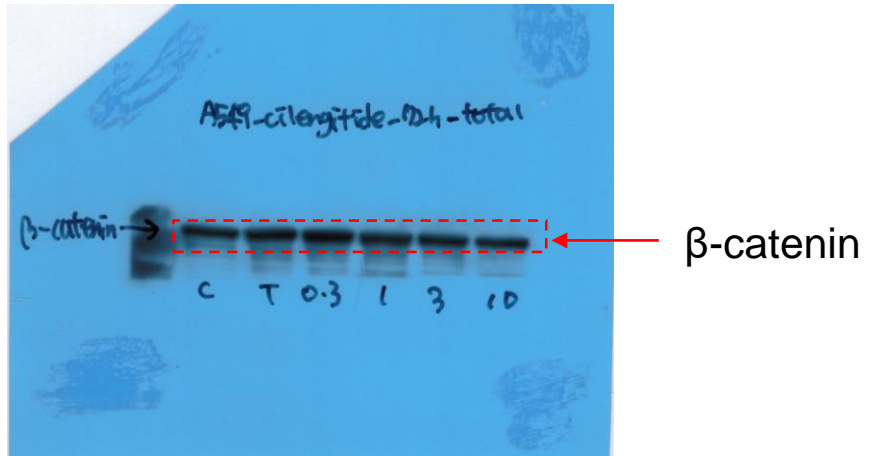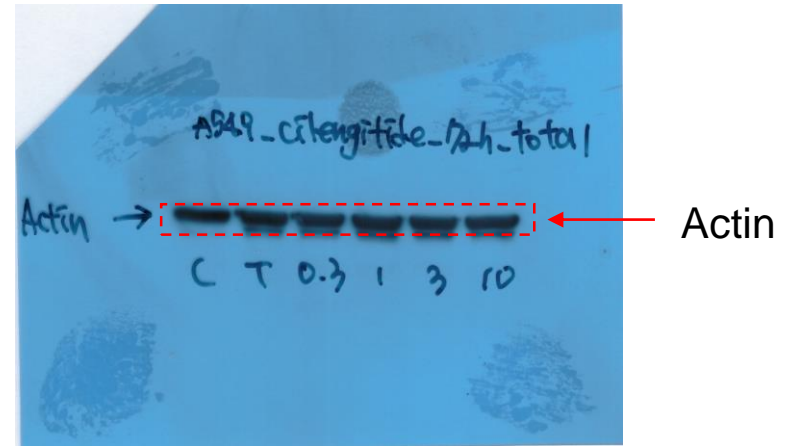

A549\_Combi (Gefitinib + Cilengitide)

1. control 2. TGF- $\beta$ 1 (5 ng/ml) 3. TGF- $\beta$ 1 + Gefitinib 1  $\mu$ M 4. TGF- $\beta$ 1 + Cilengitide 3  $\mu$ M  
5. TGF- $\beta$ 1 + Gefitinib 1  $\mu$ M + Cilengitide 3  $\mu$ M

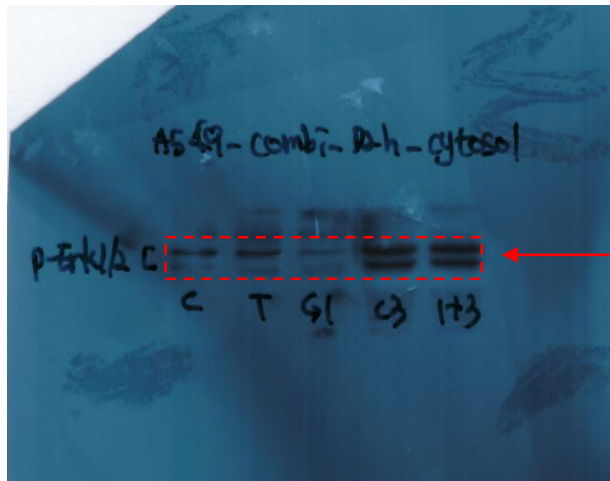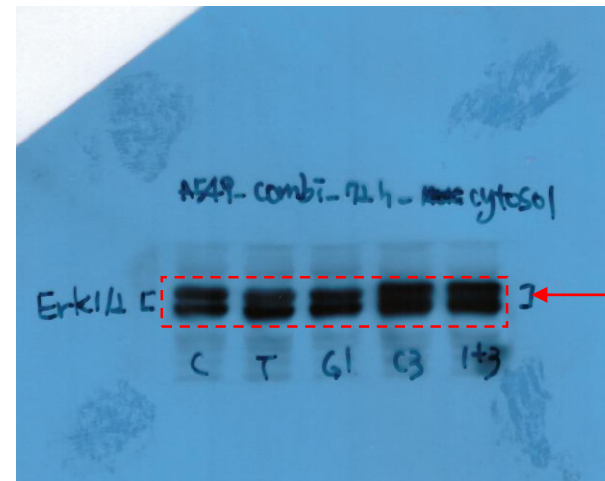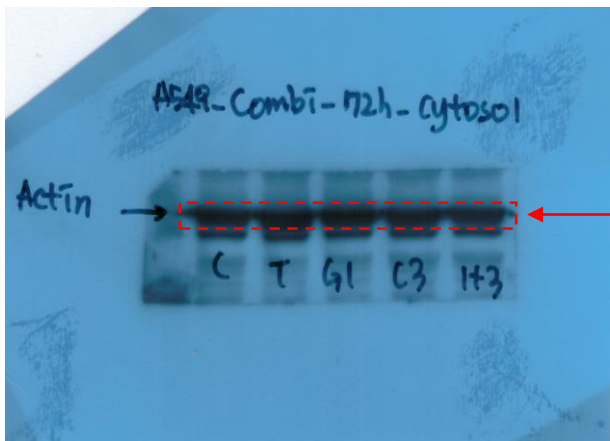

### A549\_Combi (Gefitinib + Cilengitide)

1. control 2. TGF- $\beta$ 1 (5 ng/ml) 3. TGF- $\beta$ 1 + Gefitinib 1 $\mu$ M 4. TGF- $\beta$ 1 + cilengitide 3 $\mu$ M  
5. TGF- $\beta$ 1 + Gefitinib 1 $\mu$ M + cilengitide 3 $\mu$ M

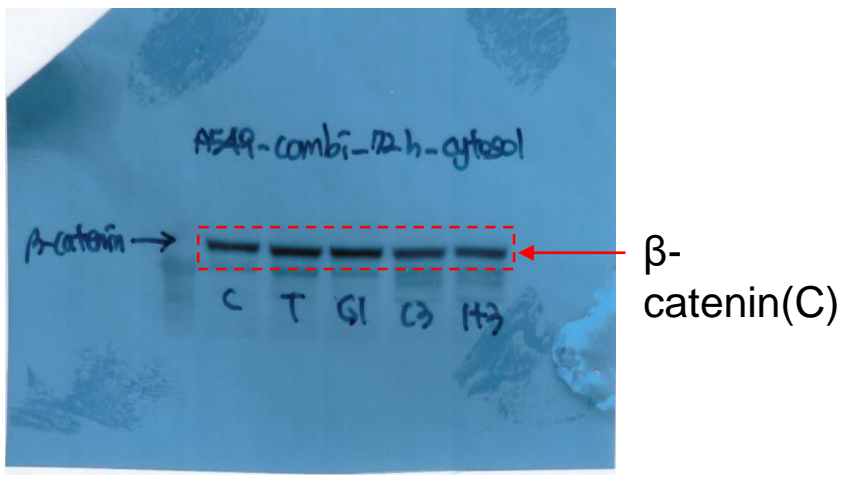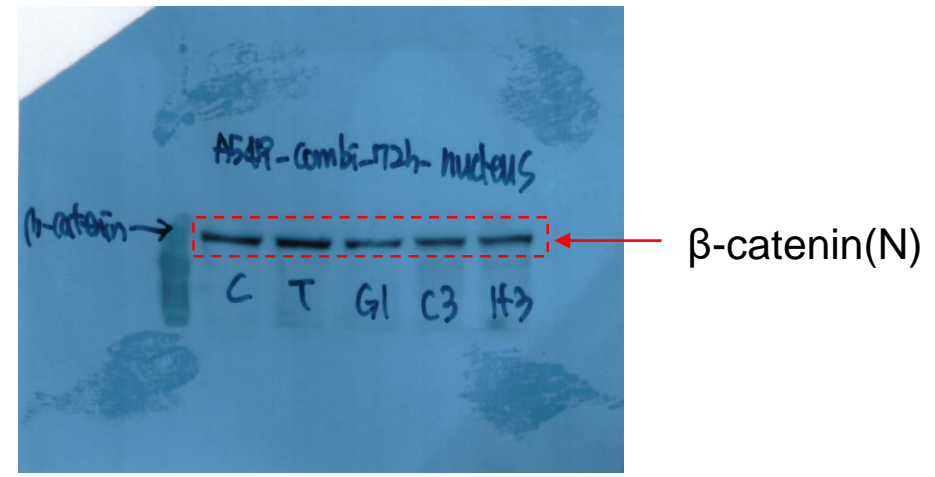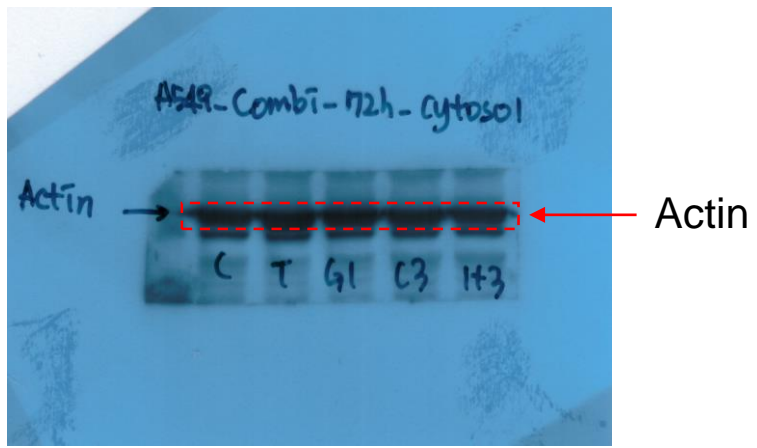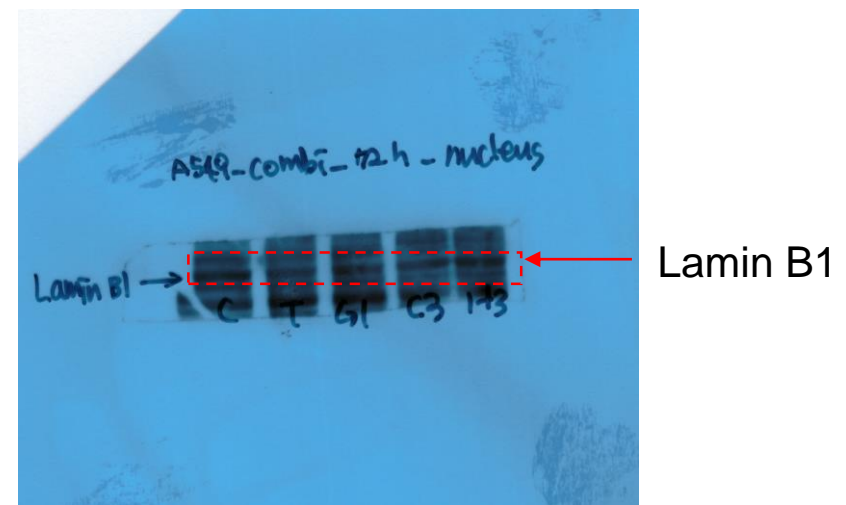

Supplement: datasheet1.pdf [file datasheet1.pdf]
